# Supplementary material for: Lipid droplet dynamics regulate adult muscle stem cell fate
Source: PubMed Central journal article supplement — Cell Rep. Author manuscript; Available in PMC 2022 May 24. (PMC9127130; doi:10.1016/j.celrep.2021.110267), 2022-01-18
Supplement: NIHMS1772780-supplement-1.pdf [file NIHMS1772780-supplement-1.pdf]

**Cell Reports, Volume 38**

**Supplemental information**

**Lipid droplet dynamics regulate**

**adult muscle stem cell fate**

**Feng Yue, Stephanie N. Oprescu, Jiamin Qiu, Lijie Gu, Lijia Zhang, Jingjuan Chen, Naagarajan Narayanan, Meng Deng, and Shihuan Kuang**

Figure S1

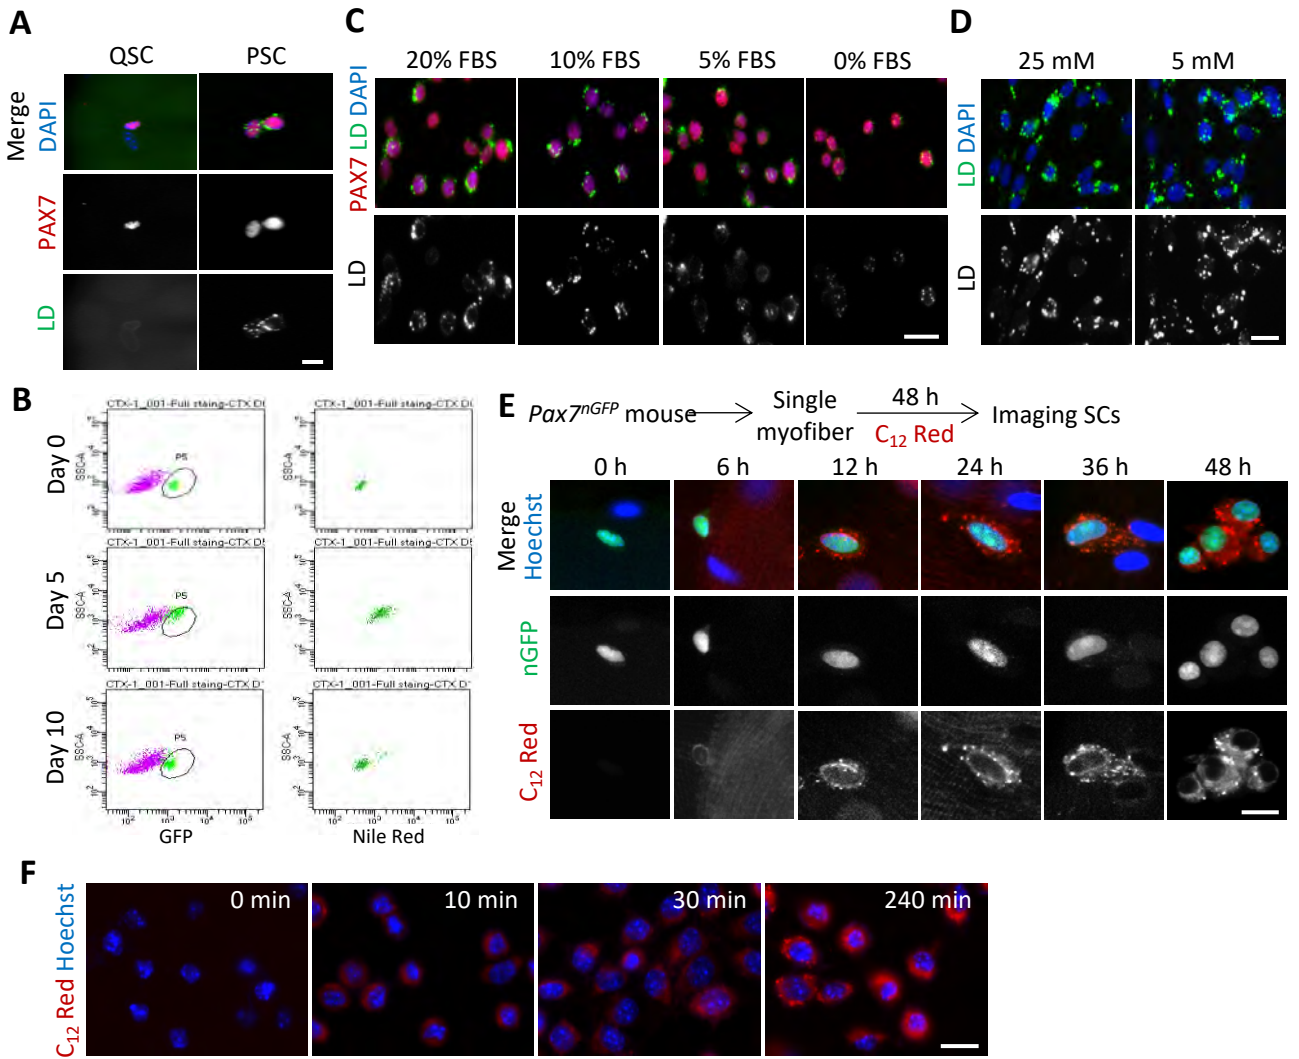

**Figure S1. Fatty Acid, But Not Glucose Contributes to LD Formation in SCs.**

(A) Representative images of LDs (labeled in green with BODIPY493/503) in quiescent and proliferating SCs (QSCs and PSCs, PAX7<sup>+</sup>) attached on host myofibers cultured for 0 h (QSC) and 42 h (PSC). Scale bar, 10  $\mu$ m.

(B) Representative dot plot showing increased LD contents in activated SCs compared to quiescent SCs and self-renewed SCs during muscle regeneration.

(C) Immunostaining of SC-derived primary myoblasts cultured with gradient serum conditions for 24 h. LDs were identified by BODIPY493/503 (green), nuclei were counterstained with DAPI. Scale bar, 20  $\mu$ m.

(D) LDs in SC-derived primary myoblasts cultured with 25 mM and 5 mM glucose for 24 h. Scale bar, 20  $\mu$ m.

(E) Live cell fatty acid tracing with C<sub>12</sub> Red (BODIPY558/568 C<sub>12</sub>, a red fluorescent fatty acid) in cultured *Pax7<sup>nGFP</sup>* myofibers. Nuclei were counterstained with Hoechst. Scale bar, 10  $\mu$ m.

(F) Live cell fatty acid tracing with C<sub>12</sub> Red in cultured SC-derived primary myoblasts. Scale bar, 20  $\mu$ m.

Related to Figure 1.

Figure S2

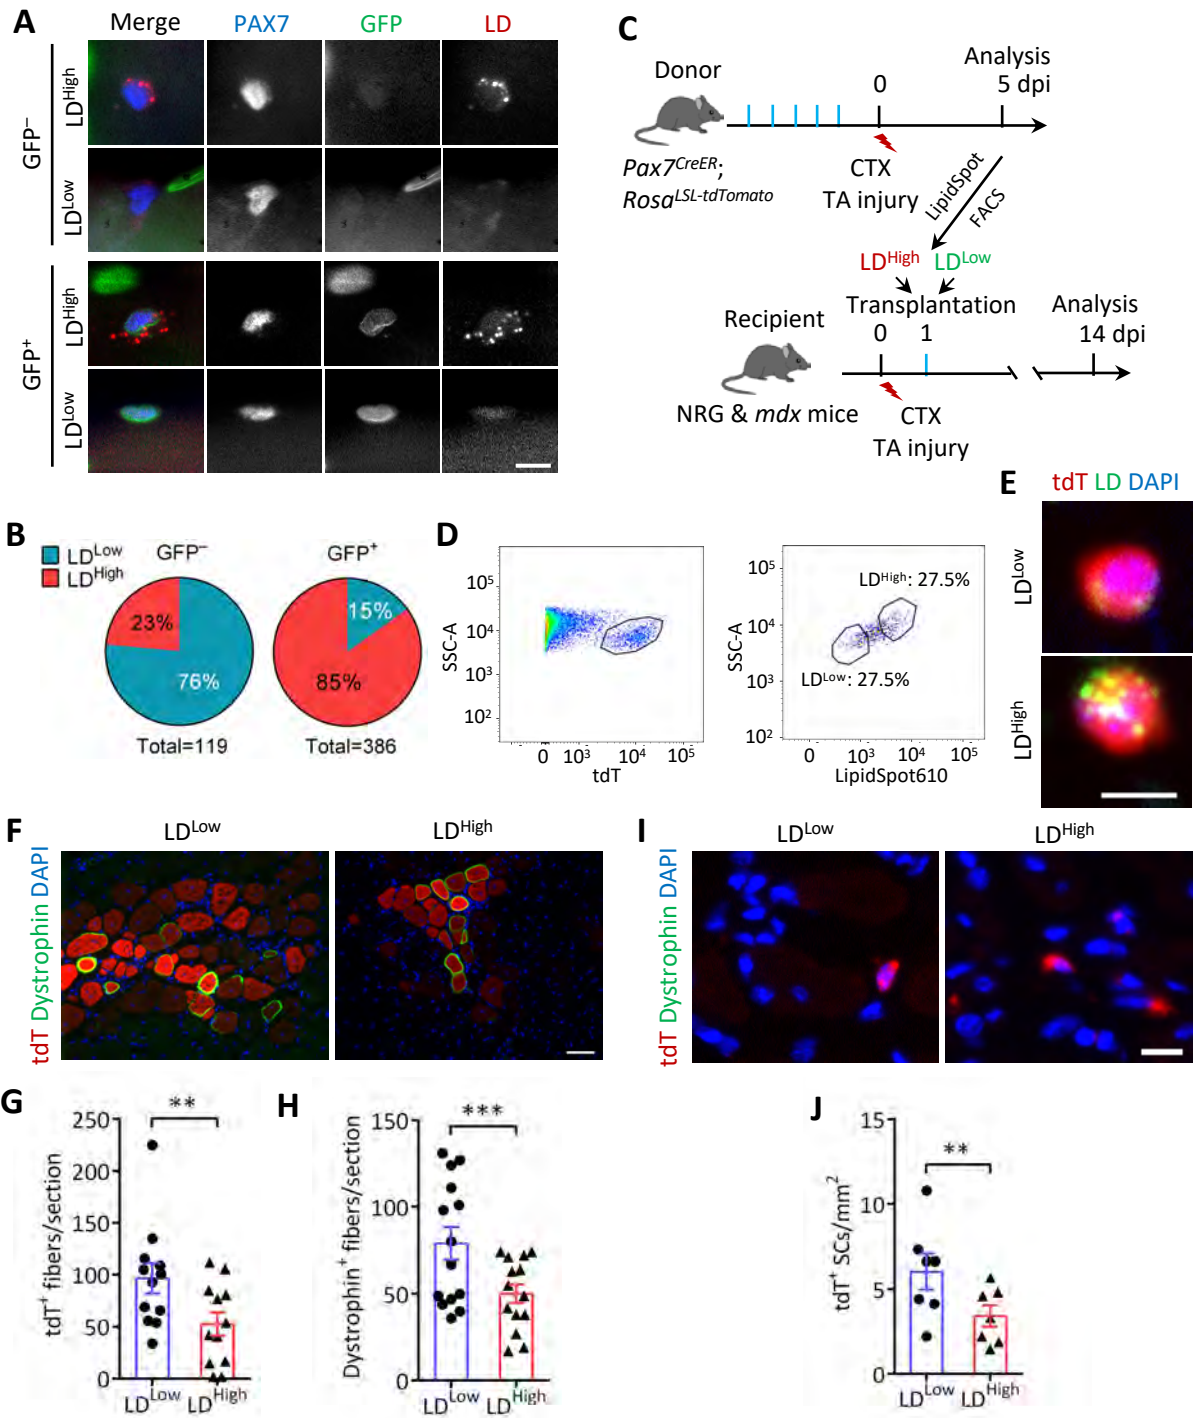

**Figure S2. LD<sup>Low</sup> SCs display higher clonal and self-renewal capacity than LD<sup>High</sup> SCs.**

(A) Representative images of LDs in single SCs on *Myf5Cre;Rosa26<sup>sfGFP</sup>* myofibers cultured for 48 h. GFP<sup>-</sup> and GFP<sup>+</sup> indicate stem and committed SCs, respectively. LDs were identified by LipidTOX (Red). Scale bar, 10  $\mu$ m.

(B) Quantification of the LD<sup>Low</sup> and LD<sup>High</sup> cell percentage in GFP<sup>-</sup> and GFP<sup>+</sup> single SCs as shown in (A).  $n = 4$  mice, total 119 GFP<sup>-</sup> and 386 GFP<sup>+</sup> SCs were analyzed.

(C) Experimental scheme showing the isolation of LD<sup>Low</sup> and LD<sup>High</sup> SCs and following transplantation design.

(D) Dot plot diagram of flow cytometry showing the population of LD<sup>Low</sup> and LD<sup>High</sup> SCs sorted for transplantation experiment.

(E) Representative images of LD<sup>Low</sup> and LD<sup>High</sup> SCs sorted for transplantation experiment. Scale bar, 10  $\mu$ m.

(F and G) Representative images showing tdT<sup>+</sup> myofibers (F) and quantification of the number of tdT<sup>+</sup> myofibers (G) in regenerated muscles of *mdx* mice transplanted with FACS-isolated LD<sup>Low</sup> and LD<sup>High</sup> SCs at 14 dpi.  $n = 12$  mice. Scale bar, 50  $\mu$ m.

(H) Quantification of the number of dystrophin<sup>+</sup> myofibers in regenerated muscles of *mdx* mice.  $n = 12$  mice. Scale bar, 50  $\mu$ m.

(I and J) Representative images showing tdT<sup>+</sup> SCs (I) and quantification of the number of tdT<sup>+</sup> SCs (J) in regenerated muscles of *mdx* mice transplanted with FACS-isolated LD<sup>Low</sup> and LD<sup>High</sup> SCs at 14 dpi.  $n = 7$  mice. Scale bar, 10  $\mu$ m.

Data are presented as mean  $\pm$  SD; Student's *t*-test. \*\* $P < 0.01$ , \*\*\* $P < 0.001$ .

Related to Figure 2.

Figure S3

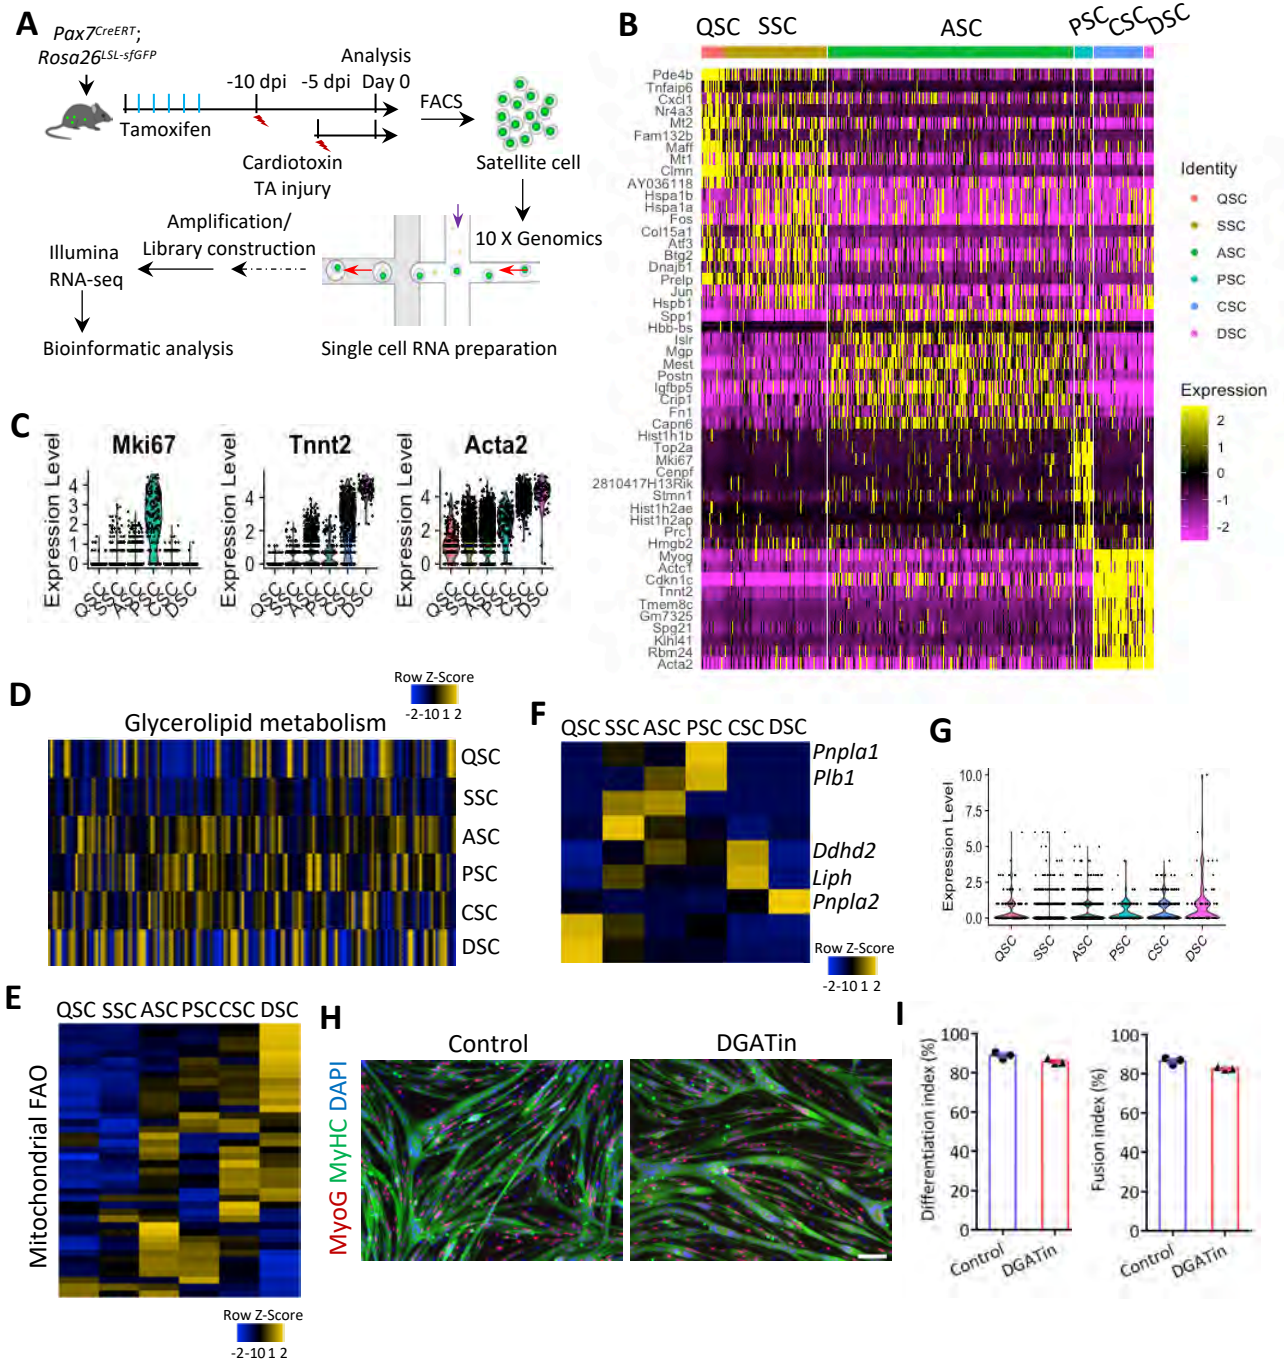

**Figure S3. Enrichment of Lipid Metabolic Genes in Committed and Differentiating SCs.**

(A) Experimental scheme showing SC tagging and isolation from non-injured and cardiotoxin (CTX)-injured TA muscles at 5 dpi and 10 dpi for scRNA-seq analysis.  $n=3$  mice for each condition.

(B) Heatmap visualizing the top 10 markers to determine specificity aiding with nomenclature for cluster identities.

(C) Violin plot showing the expression of SC markers at various stages informing cluster annotation of subpopulation.

(D) Heatmap of the annotated Gene Ontology term glycerolipid metabolic process genes in various SC cluster.

(E) Heatmap showing the enrichment of mitochondrial FAO pathway (GO:0006635) in various SC cluster.

(F) Heatmap of the genes annotated in triglyceride catabolic process (GO:0019433) in various SC cluster.

(G) Violin plot showing the expression of *Pnpla2* at various SC stages.

(H and I) Representative immunostaining of MyoG and MyHC (H) and quantification of differentiation and fusion index (I) in cultures of differentiated myotubes treated with DGAT inhibitors for 2 days.  $n = 3$ . Scale bar, 50  $\mu\text{m}$ .

Related to Figure 3.



Figure S4

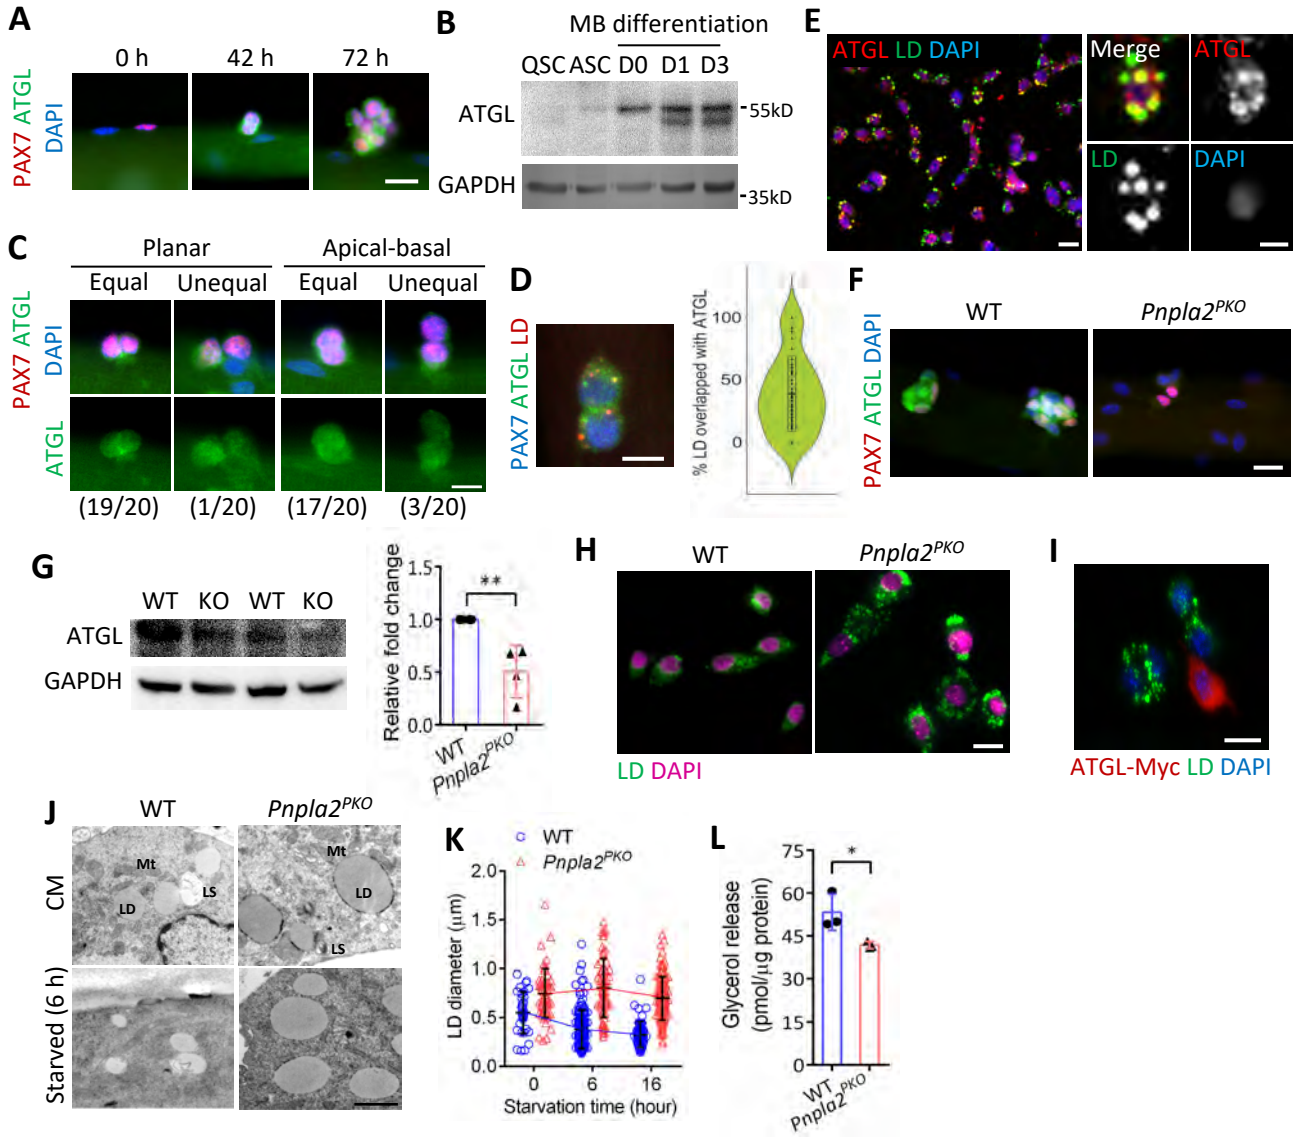



**Figure S4. ATGL Targets to LDs for Lipolysis in Activated and Proliferating SCs.**

(A) Immunostaining of ATGL in SCs on single myofibers cultured for 0 h, 42 h, and 72 h. Scale bar, 20  $\mu$ m.

(B) Immunoblotting of ATGL in quiescent and activated SCs isolated by FACS from non-injured and injured (5dpi) muscles, and in cultured SC-derived primary myoblasts after induced for differentiation.

(C) Immunostaining of ATGL and quantification of the equal and unequal distribution of ATGL protein in SC doublets on single myofibers cultured for 48 h. Scale bar, 10  $\mu$ m.

(D) Immunostaining images showing co-localization of LDs with ATGL in SCs on cultured single myofibers at 48 h, and violin plots showing percentage of LDs that co-localize with ATGL puncta. LDs were identified by LipidTOX (Red), nuclei were counterstained with DAPI (blue).  $n = 3$  mice, 595 LDs in 76 SCs were analyzed. Scale bar, 10  $\mu$ m.

(E) Immunostaining images showing co-localization of LD with ATGL in cultured SC-derived primary myoblasts. LDs were identified by BODIPY493/503. Scale bar, 20  $\mu$ m.

(F) Immunostaining images showing depletion of ATGL in cultured SCs attached to a single myofiber isolated from *Pnpla2<sup>PKO</sup>* mice (1 week after tamoxifen induced knockout), leading reduced cell number. Nuclei were counterstained with DAPI.

(G) Western blot analysis of WT and *Pnpla2<sup>PKO</sup>* primary myoblasts confirming the depletion of ATGL.

(H) Immunostaining images showing increased LD accumulation in *Pnpla2<sup>PKO</sup>* SC-derived primary myoblasts. LDs were identified by BODIPY493/503. Scale bar, 10  $\mu$ m.

(I) Immunostaining ATGL and LDs in primary myoblasts 36 h after transfection of pKMyc-ATGL plasmid. Scale bar, 10  $\mu$ m.

(J and K) TEM images (J) and LD diameter distribution (K) in WT and *Pnpla2<sup>PKO</sup>* SC-derived primary myoblasts cultured under serum starvation conditions. Number of LD quantified at 0 h, WT:  $n = 32$ , *Pnpla2<sup>PKO</sup>*:  $n = 56$ ; at 6 h, WT:  $n = 141$ , *Pnpla2<sup>PKO</sup>*:  $n = 66$ ; at 16 h, WT:  $n = 63$ , *Pnpla2<sup>PKO</sup>*:  $n = 106$ . LD: lipid droplet, LS: lysosome, Mt: mitochondria. Scale bar, 1  $\mu$ m.

(L) Glycerol release, as an indicator of lipolysis, measured as glycerol content in culture medium normalized to total protein level of cultured FACS-sorted WT and *Pnpla2<sup>PKO</sup>* SCs.  $n = 3$  mice.

Data are presented as mean  $\pm$  SD; Student's *t*-test. \* $P < 0.05$ , \*\* $P < 0.01$ .

Related to Figure 4.

Figure S5

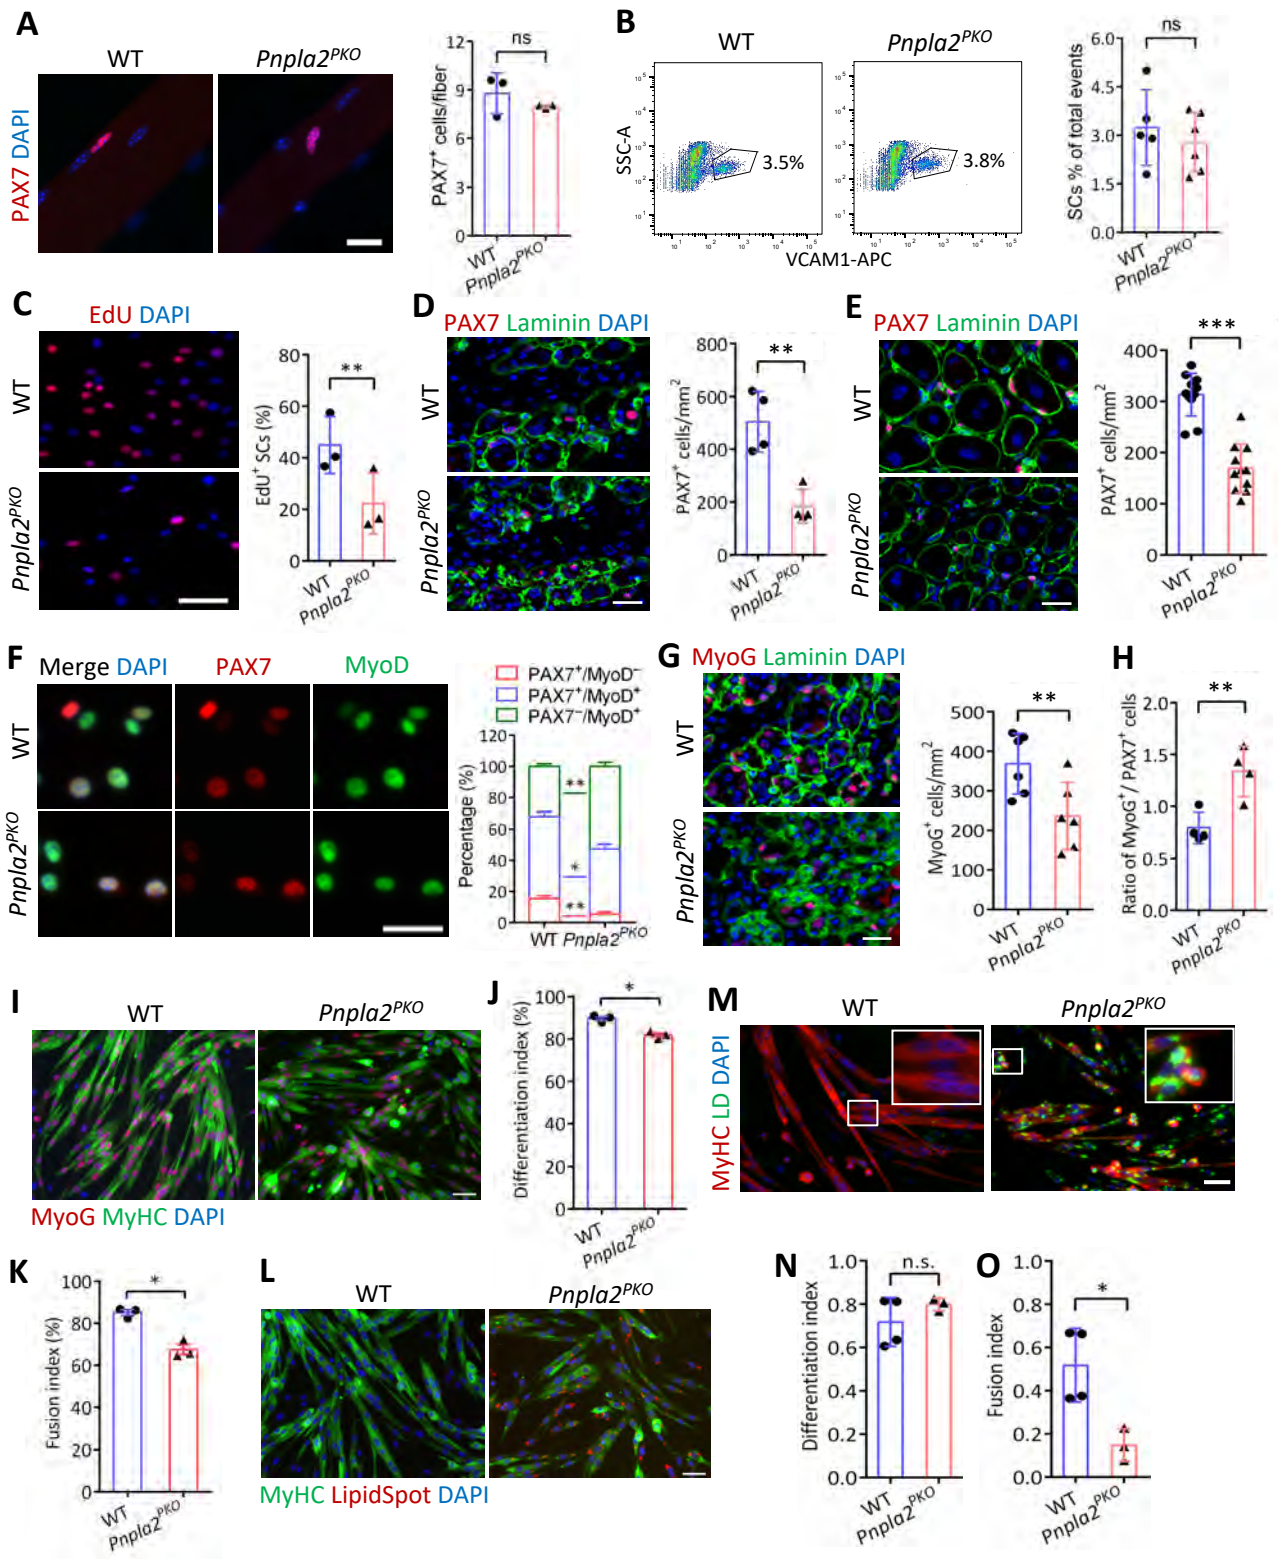

### Figure S5. ATGL Is Required for Myogenic Function of SCs.

(A) Immunostaining and quantification of QSC number on WT and *Pnpla2<sup>PKO</sup>* myofibers 1 week after TMX treatment *in vivo*. *n* = 3 mice. Scale bar, 20  $\mu$ m.

(B) Dot plot diagram of flow cytometry and quantification of QSC number in WT and *Pnpla2<sup>PKO</sup>* muscles 1 week after TMX treatment *in vivo*. WT: *n* = 5 mice, *Pnpla2<sup>PKO</sup>*: *n* = 6 mice. QSC number was showed by percentage of total events.

(C) EdU labeling and quantification in FACS-isolated SCs after 12 h of pulsing. *n* = 3 mice, average 654 cells were analyzed from each mice. Scale bar, 50  $\mu$ m.

(D and E) Immunostaining of PAX7 and quantification of PAX7<sup>+</sup> SC number on cross-sections of young adult WT and *Pnpla2<sup>PKO</sup>* TA muscles at 3.5 (D) and 5.5 dpi (E). 3.5 dpi: *n* = 4 mice, 5.5 dpi: *n* = 11 mice. Scale bar, 50  $\mu$ m.

(F) Representative PAX7 and MyoD immunostaining and quantification in cultured FACS-sorted SCs showing the reduction of self-renewing (PAX7<sup>+</sup>/MyoD<sup>-</sup>) SCs and increase of committed (PAX7<sup>-</sup>/MyoD<sup>+</sup>) SCs. WT: *n* = 5 mice, *Pnpla2<sup>PKO</sup>*: *n* = 4 mice, 3666 SCs in WT and 635 SCs in *Pnpla2<sup>PKO</sup>* mice were analyzed. Scale bar, 50  $\mu$ m.

(G) Immunostaining of MyoG and quantification of MyoG<sup>+</sup> cell number on cross-sections of young adult WT and *Pnpla2<sup>PKO</sup>* TA muscles at 3.5 dpi. *n* = 6 mice. Scale bar, 50  $\mu$ m.

(H) Ratio of MyoG<sup>+</sup> to PAX7<sup>+</sup> cells on muscle cross-sections at 3.5 dpi showing in (F) and (J). *n* = 4 mice.

(I-K) Immunostaining of MyoG and MyHC in differentiated myotubes (I), and quantification of differentiation (J) and fusion index (K). FACS-isolated SCs from WT and *Pnpla2<sup>PKO</sup>* resting muscles were plated and immediately differentiated upon attachment for 2 days. *n* = 3 mice. Scale bar, 20  $\mu$ m.

(L) Immunostaining of MyHC and LDs in differentiated myotubes. Scale bar, 20  $\mu$ m.

(M-O) Immunostaining of MyHC and LDs in differentiated myotubes (M), and quantification of differentiation (N) and fusion index (O). FACS-isolated SCs from WT and *Pnpla2<sup>PKO</sup>* resting muscles were cultured for 7 days and induced differentiation for 2 days. WT: *n* = 4 mice; *Pnpla2<sup>PKO</sup>*: *n* = 3 mice. Scale bar, 50  $\mu$ m.

Data are presented as mean  $\pm$  SD; Student's *t*-test. \**P* < 0.05, \*\**P* < 0.01, \*\*\**P* < 0.001, n.s., no significance.

Related to Figure 4.

Figure S6

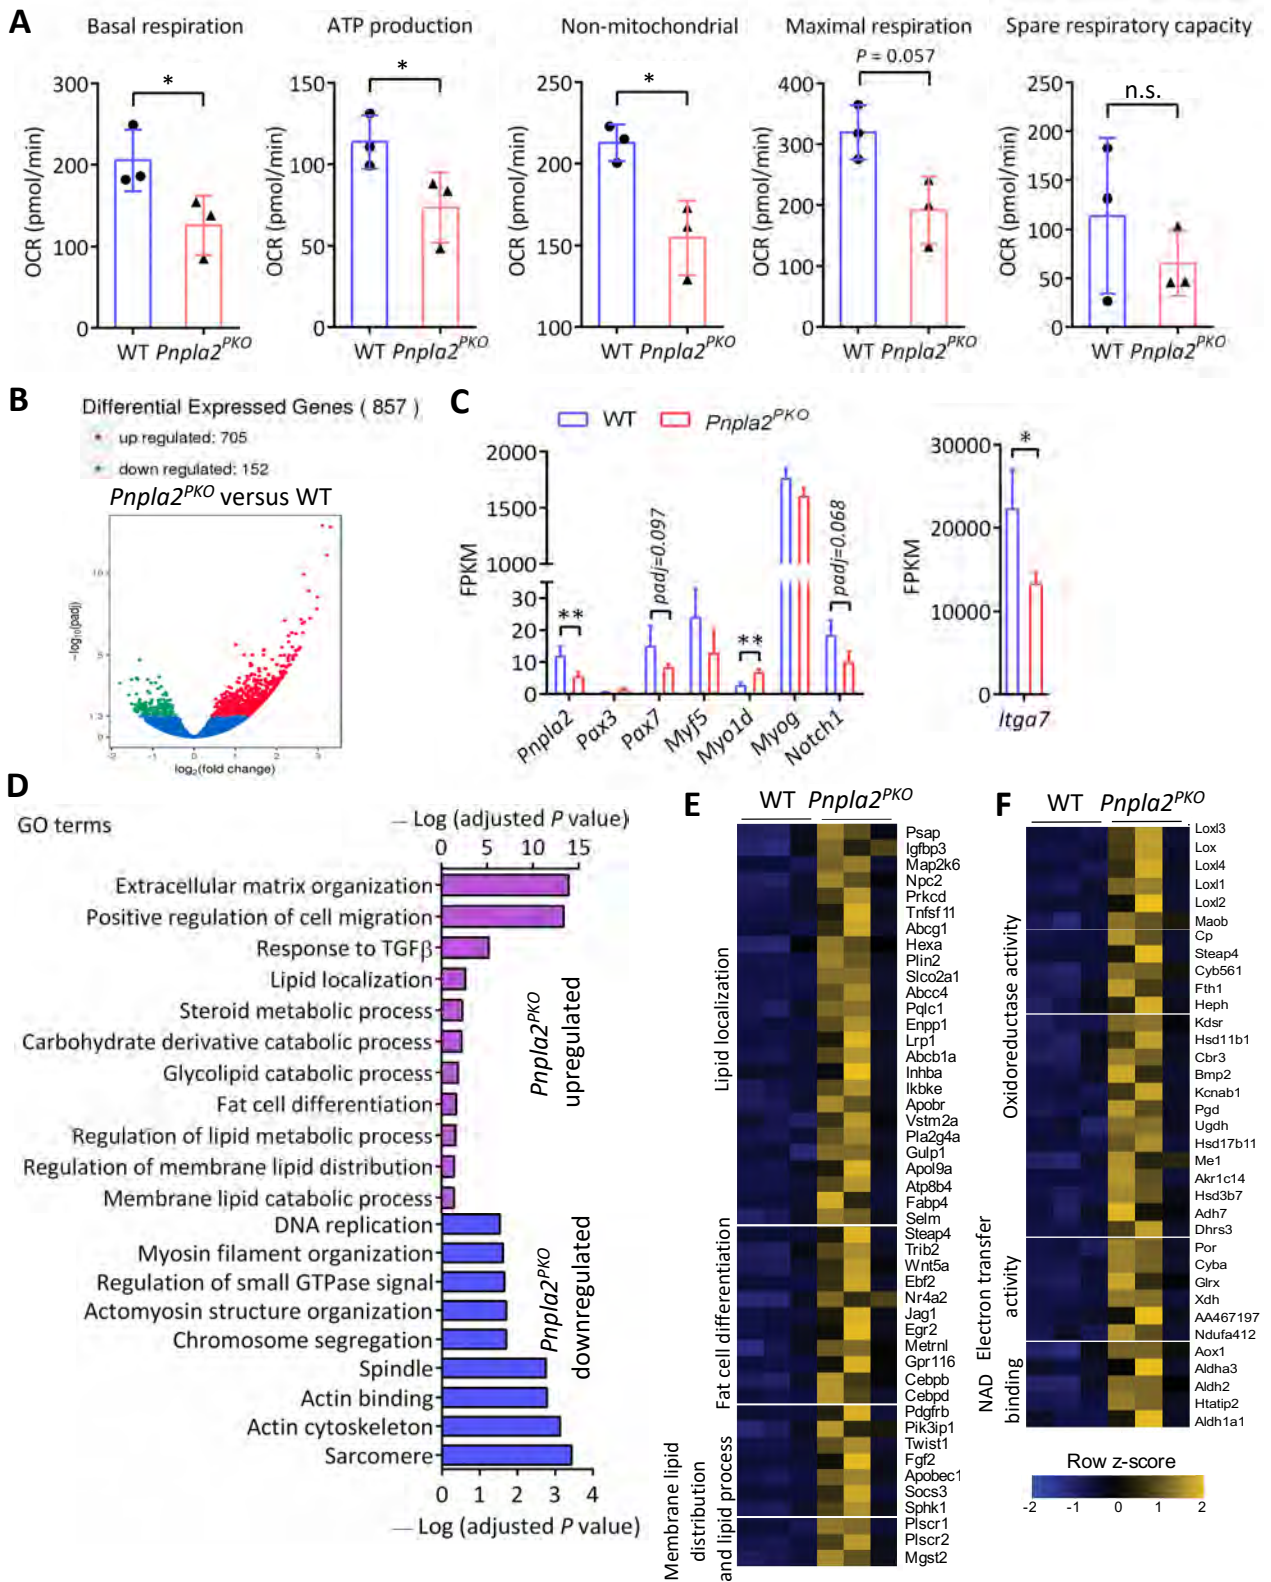

**Figure S6. Reduced Oxygen Consumption Rate and Global Changes of Genes Related to Energy Metabolism in *Pnpla2<sup>PKO</sup>* SCs.**

(A) OCR of cultured WT and *Pnpla2<sup>PKO</sup>* SC-derived primary myoblasts with or without Etomoxir (50  $\mu$ M for 15 min before the test).  $n = 3$  independent experiments.

(B) Volcano diagram of differentially expressed genes in *Pnpla2<sup>PKO</sup>* SCs versus WT control. Blue dots indicate genes without significant difference, red and dots indicate genes upregulated and downregulated in *Pnpla2<sup>PKO</sup>* SCs.  $n = 3$  mice.

(C) Expression of myogenic genes, *Notch1* and *integrin  $\alpha$  7 (ITGA7)* in WT and *Pnpla2<sup>PKO</sup>* SCs derived from RNA-seq data.

(D) GO analysis shows biological processes enriched in *Pnpla2<sup>PKO</sup>* SCs.

(E) Heatmap representing differential gene expression shows a global increase of lipid metabolism in *Pnpla2<sup>PKO</sup>* SCs.  $n = 3$  mice.

(F) Heatmap representing the upregulated genes related to oxidoreductase and electron transfer activity in *Pnpla2<sup>PKO</sup>* SCs.  $n = 3$  mice.

Data are presented as mean  $\pm$  SD; Student's *t*-test. \* $P < 0.05$ , \*\* $P < 0.01$ , ns, no significance.

Related to Figure 6.



Figure S7

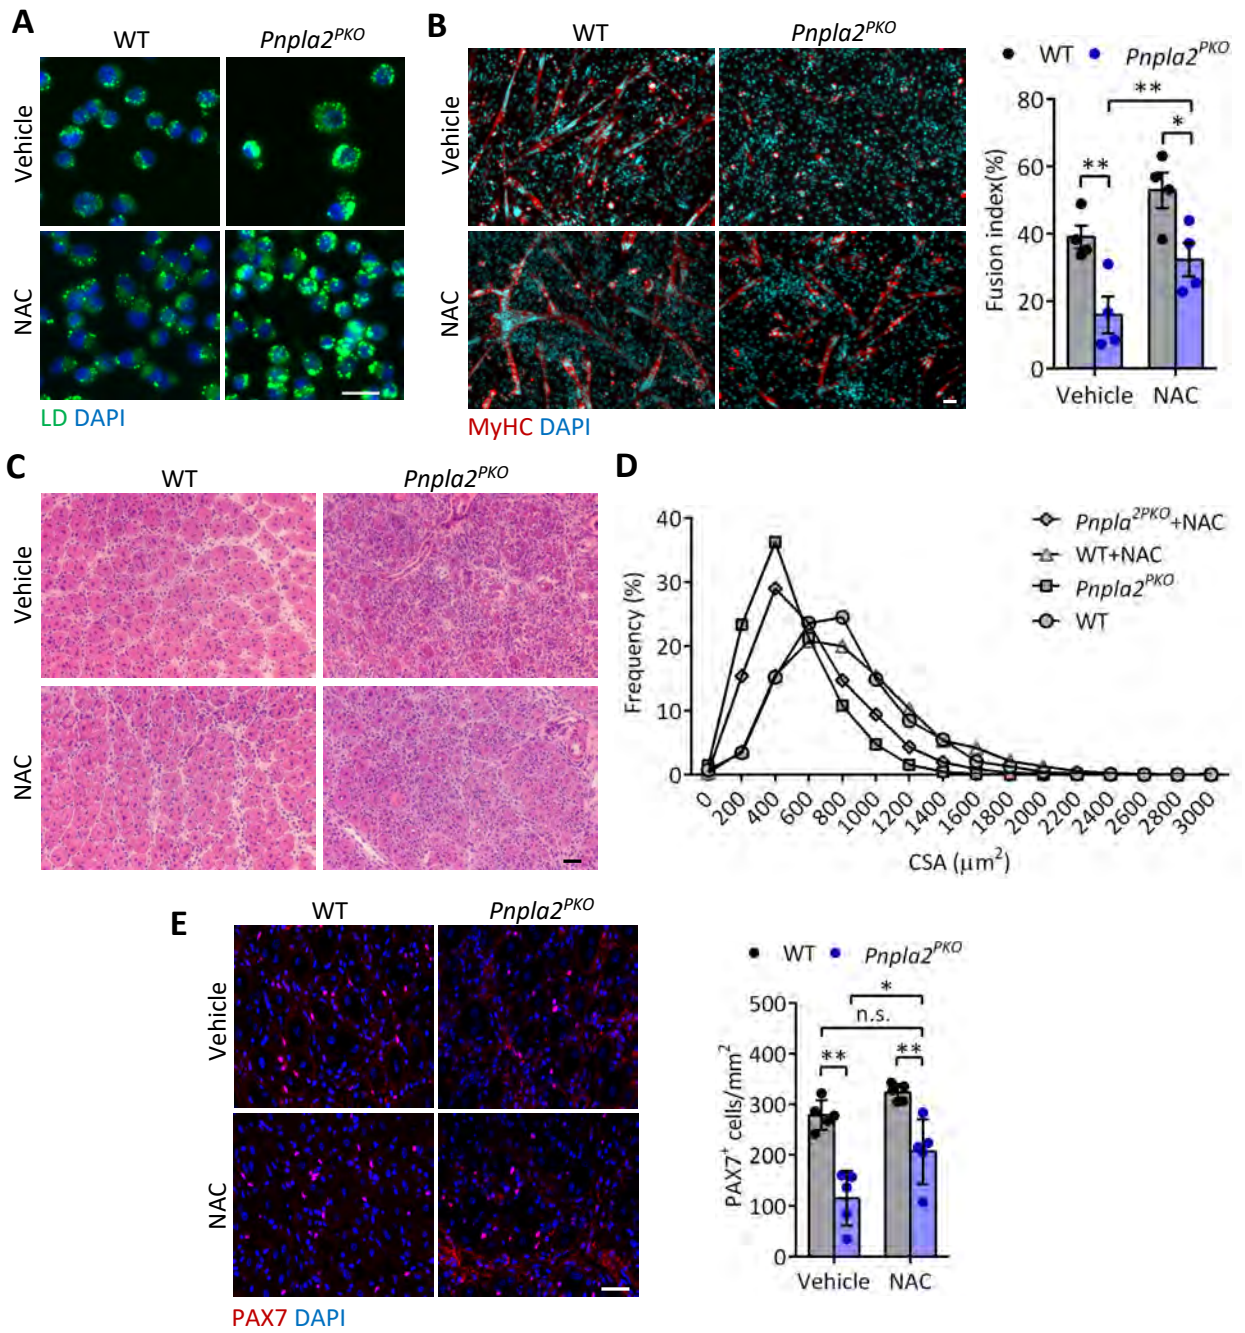

**Figure S7. NAC Supplementation Partially Restores the Differentiation Potential of ATGL-deficient SCs and Muscle Regeneration.**

(A) Representative images showing LDs in cultured FACS-sorted SCs with or without NAC (5 mM). Scale bar, 20  $\mu\text{m}$ .

(B) Immunostaining of MyHC and quantification of fusion index in muscle cell mixture after 2 days differentiation cultured with or without NAC (5 mM).  $n = 4$  mice in each condition. Scale bar, 50  $\mu\text{m}$ .

(C) Hematoxylin and eosin (H&E) staining of TA muscle cross-sections from WT and *Pnpla2<sup>PKO</sup>* mice with or without NAC treatment at 5.5 dpi.  $n = 4$  mice in each condition. Scale bar, 50  $\mu\text{m}$ .

(D) CSA distribution of dystrophin<sup>+</sup> myofibers in TA muscle cross-sections from WT and *Pnpla2<sup>PKO</sup>* mice with or without NAC treatment at 5.5 dpi.  $n = 5$  mice. 2625, 1724, 2517, and 2171 myofibers were analyzed for WT, *Pnpla2<sup>PKO</sup>*, WT+NAC and *Pnpla2<sup>PKO</sup>*+NAC, respectively.

(E) Immunostaining of PAX7 and quantification of PAX7<sup>+</sup> cell number on TA muscle cross-sections of WT and *Pnpla2<sup>PKO</sup>* mice after NAC treatment at 5.5 dpi. Scale bar, 50  $\mu\text{m}$ .

Data are presented as mean  $\pm$  SD; Student's *t*-test. \* $P < 0.05$ , \*\* $P < 0.01$ , n.s. no significance.

Related to Figure 7.



**Table S2. List of antibodies used in this study, Related to STAR Methods.**

| <b>Antibody</b>                                  | <b>Manufacture</b>       | <b>Catalog #</b> | <b>Application</b>      |
|--------------------------------------------------|--------------------------|------------------|-------------------------|
| Mouse monoclonal anti-PAX7                       | DSHB                     | #PAX7            | IF (1:10)               |
| Mouse monoclonal anti-MyoD                       | Santa Cruz Biotechnology | sc-377460        | IF (1:1000)             |
| Mouse monoclonal anti-MyoG                       | DSHB                     | F5D              | IF (1:1000)             |
| Mouse monoclonal anti-MyHC                       | DSHB                     | MF-20            | IF (1:100)              |
| Mouse monoclonal anti-eMyHC                      | DSHB                     | F1.652           | IF (1:100)              |
| Rabbit polyclonal anti-Laminin                   | Sigma                    | L9393            | IF (1:1000)             |
| Rabbit polyclonal anti-Dystrophin                | Abcam                    | ab15277          | IF (1:1000)             |
| Rabbit polyclonal anti-Ki67                      | Abcam                    | ab15580          | IF (1:1000)             |
| Rabbit polyclonal anti-ATGL                      | Cell Signaling           | #2439            | IF (1:200), IB (1:1000) |
| Mouse monoclonal anti-GAPDH                      | Santa Cruz Biotechnology | sc-32233         | IB (1:3000)             |
| PE Rat anti-mouse CD31 antibody                  | BD Biosciences           | #553373          | FACS (1:1000)           |
| PE anti-mouse CD45 antibody                      | eBioscience              | #12-0451-82      | FACS (1:1000)           |
| Pacific Blue anti-mouse Ly-6A/E (Sca-1) antibody | BioLegend                | #122520          | FACS (1:1000)           |
| APC anti-mouse CD106 antibody                    | BioLegend                | #105718          | FACS (1:5000)           |
| Alexa 568 goat anti-mouse IgG1                   | Invitrogen               | A-21124          | IF (1:1000)             |
| Alexa 488 goat anti-mouse IgG1                   | Invitrogen               | A-21121          | IF (1:1000)             |
| Alexa 647 goat anti-mouse IgG2b                  | Invitrogen               | A-21242          | IF (1:1000)             |
| Alexa 488 goat anti-rabbit IgG                   | Invitrogen               | A-11034          | IF (1:1000)             |
| Alexa 647 goat anti-rabbit IgG                   | Invitrogen               | A-21244          | IF (1:1000)             |
| HRP AffiniPure goat anti-mouse IgG               | Jackson ImmunoResearch   | 115-035-003      | IB (1:10,000)           |
| HRP AffiniPure goat anti-rabbit IgG              | Jackson ImmunoResearch   | 111-035-003      | IB (1:10,000)           |

**Table S3. qPCR primer sequences, Related to STAR Methods.**

| <b>Gene name</b>          | <b>Sequence (5' to 3')</b> |
|---------------------------|----------------------------|
| <i>Pax7</i> : forward     | TCTCCAAGATTCTGTGCCGAT      |
| <i>Pax7</i> : reverse     | CGGGGTTCTCTCTTATACTCC      |
| <i>Myf5</i> : forward     | AAGGCTCCTGTATCCCCTCAC      |
| <i>Myf5</i> : reverse     | TGACCTTCTTCAGGCGTCTAC      |
| <i>Myogenin</i> : forward | TGCCCAGTGAATGCAACTCC       |
| <i>Myogenin</i> : reverse | TTGGGCATGGTTTCGTCTGG       |
| <i>Spry1</i> : forward    | GGTCATAGGTCAGATCGGGTC      |
| <i>Spry1</i> : reverse    | CTTGCCACACTGTTTCGCAG       |
| <i>Plin2</i> : forward    | GACCTTGTGTCCTCCGCTTAT      |
| <i>Plin2</i> : reverse    | CAACCGCAATTTGTGGCTC        |
| <i>Gapdh</i> : forward    | AGGTCGGTGTGAACGGATTG       |
| <i>Gapdh</i> : reverse    | TGTAGACCATGTAGTTGAGGTCA    |
